# Supplementary material
Source: PubMed Central journal article supplement (PMC4260572)
Supplement: pnas.1413131111.sapp.pdf [file pnas.1413131111.sapp.pdf]

## **Supporting Appendix:**

Figs. S1-S8

Tables S1-S10

## **Materials and Methods**

### *Human Remains Materials and Methods*

Following a skeletal inventory, osteometric measurements were taken of all complete and refitted elements. The approximate ages of Individuals 1 and 2, along with length and weight of the latter, were then estimated using several standard techniques (1-8). Aging based on the state of deciduous crown development follows (9) and (10). These two methods account for multiple formation stages to facilitate precision in aging young individuals; however, both are based on European reference groups. A third method adjusted for aging Native Americans (11) is also used, but is primarily based on eruption times so in this case is more subjective.

Recording of the 22 dental nonmetric traits in the deciduous crowns of Individual 1 was effected using the method of Sciulli (12). With exception, this method emulates the Arizona State University Dental Anthropology System (ASUDAS) (13) and other previous approaches for the study of permanent teeth. The utility of these traits is well known (14-15). Briefly, they have minimal inter- and intra-observer recording error rates, are easily identifiable, represent all dental morphogenetic fields, are not sexually dimorphic and, of most importance, because they are evolutionarily conservative with a high genetic component in their expression (16-18), are excellent markers for biodistance analyses (19). Beyond simply making them available to interested researchers, these data are included to show that the USR site inhabitants apparently possessed a Sinodont-like dental pattern (16) present in all Northeast Asians and Native Americans; there are researchers who believe that some early immigrants had alternate origins and/or possess a morphologically simpler Sundadont pattern (16).

The success of sex estimation in infant skeletal remains differs by element and feature(s), but has most often been attempted using mandible and ilium morphology (20-24); that approach was followed here. Accuracy rates also vary by sex and among samples if derived from different populations (24). Still, Schutkowski (21) reported accuracy rates of up to 95%, though his work is based on samples of European and European-derived skeletal remains. And, many researchers are dubious that skeletal sexing of infants can be done at all. Therefore, the successful extraction of viable (nuclear or mitochondrial) aDNA is a crucial step toward final sex determination.

### *Excavation Methods*

Archaeological excavation methods follow best practices for subarctic Alaska. A metric grid was established over the entire dune and provenience was recorded by a Leica T407 total station. Excavation proceeded by natural strata for the upper soil horizons and contoured arbitrary 10 cm levels within sediments relatively unaltered by soil processes (C-horizon). Given the wide vertical separation (~20-90 cm) between components 10 cm levels were appropriate. Finer levels were used to recover materials within features and the occupation surface. All sediments were dry-sieved through 1/8-in screens by 50 x 50 cm quadrants (except 25 cm quadrants established for the burial). Feature and control sediments were collected in bulk by quadrant for further laboratory analyses. All *in situ* items were 3-pointed and bagged separately. Bulk sediments were sieved through 1/16-in screens.

### **Description of Feature 2010-5 (cremation hearth) and Feature 2011-13 (burial pit)**

Given the complexity of the features and burials examined here, we describe the excavation process (Fig. S6-S8 and Table S10). During excavation of the F2010-5 (termed Feature 5 in 2010) hearth we recovered the hearth in its entirety, clearly demarcated stratigraphically by oxidized sediment, large quantities of charcoal, and faunal remains (between 65-82 cm BD). At the lower contact of the oxidized sediment (hearth) (~80 cm BD), we

encountered apparently unaltered aeolian silts (C-horizon), with a similar Munsell color as the surrounding (sterile) aeolian sediments. At the time, we excavated 5 cm below the bottom of the hearth (~85 cm BD) and found no additional artifacts or human bones and halted excavation for the season. We did not observe any 'edges' indicating continuation of a feature, however, the contours were irregular due to the dimensions of the pit hearth. In the lab, we found small faunal fragments in the bulk matrices collected 0-5 cm below the bottom of the hearth.

In 2011, we excavated the residential feature and continued excavation below the F2010-5 hearth. At ~104 cm BD (~140 cm below surface (BS)), we identified a roughly circular 'stain' directly below the hearth, designating this Feature 2011-13 (Fig. S7C). The area within the C-horizon that while very similar in appearance to unaltered sediment (color, texture, grain size, presence of redoximorphic mottling), we did observe a higher water content, stronger iron oxide mottling, increased concentrations of root casts, and terrestrial snail shells (succinids) (Fig. S8). While we found no artifacts, we did recover bone fragments (fish, small mammal) localized below the pit hearth (84-106 cm BD); they were low density, with some small disassociated charcoal chunks, and the bones were found in different orientations, including vertical. Hypotheses (at that time) included hearth remains pushed into the lower C-horizon, a cache pit, a trash pit, or remnants from earlier hearth cleaning. We stopped excavation at 104-107 cm BD (~140 cmBS) and 40-50 cm below the bottom of hearth feature F2010-5, except for two quads that were taken an additional 10 cm level (to ~115 cm BD, or 150 cmBS).

In 2013, we continued excavation of this feature (F2011-13). We recovered additional scattered fauna within the feature from 114-127 cm BD. Human remains were identified, and we followed the protocols set up under the Memorandum of Agreement between National Science Foundation (lead federal agency) and the State of Alaska Office of History and Archaeology with the local Native BIA-recognized tribal entity (Healy Lake Village) as an invited signatory. Following agreement of all parties, we continued excavating the feature. We instituted additional contamination-control procedures, including gloves and facemasks and minimal contact with the remains between excavation and bagging. Delicate remains were placed in foil, archival plastic bags, and small archival boxes. We gridded the bottom of the burial pit in 25 cm units and established photo-control points (pins) via total station. All F2011-13 fill (from 114 cm BD) and the ochre layer were recovered in matrix samples for further analysis. The bottom of the ochre-stained burial pit was 124-128 cm BD (~160-170 cmBS).

The ochre layers and bone exhibit similar colors for both individual skeletal elements indicating similar treatment. Individual 1 color values range from 10R 3/2 (dusky red) to 5YR 4/3 (reddish brown) and Individual 2 color was more consistent, at 2.5YR 4/4 (yellowish red). The ochre layer was intermediate between the inside fill and the human remains, at 7.5YR 4/3 (brown) dry and 10YR 4/3 (brown) wet. The inside fill was 10YR 4/2 (dark grayish brown) and finer in texture (dominated by silts) while the unaltered C-horizon at that level was 2.5Y 4/2 (dark grayish brown) and was coarser (silty sand). This is consistent with backfill material coming partially from upper sediments, which have higher silt percentages (3). We excavated an additional 10 cm below the bottom of F2011-13 into sterile C-horizon loess. All sediment matrices have been screened for cultural remains, and no cultural materials were found below the pit feature.

## SI References

- 1 M. M. Maresh, In: *Human Growth and Development*, R.W. McCammon, Ed. (C.C Thomas, Springfield, 1970), pp. 157-200.
- 2 P. Gindhart, Growth standards for the tibia and radius in children aged one month through eighteen years. *Am. J. Phys. Anthropol.* **39**, 41 (1973).
- 3 I. Fazekas, F. Kósa, *Forensic Fetal Osteology* (Akadémiai Kiadó, Budapest, 1978).
- 4 P. Jeanty, Fetal limb biometry. *Radiology* **147**, 601(1983).
- 5 J. L. Scheuer, J. H. Musgrave, S. P. Evans, The estimation of late fetal and perinatal age from limb bone length by linear and logarithmic regression. *Ann. Hum. Biol.* **3**, 257 (1980).
- 6 T. Molleson, M. Cox, "The Spitalfields Project Vol. 2: The Anthropology." (CBA Research Report 86, Council for British Archaeology, London, 1993).
- 7 J. L. Scheuer, S. MacLaughlin-Black, Age estimation from the pars basilaris of the fetal and juvenile occipital bone. *Int. J. Osteoarchaeol.* **4**, 377 (1994).
- 8 M. Schaefer, S. Black, L. Scheuer, *Juvenile Osteology: A Laboratory and Field Manual*. (Elsevier, Inc., New York, 2009).
- 9 H. M. Liversidge, T. Molleson, Variation in crown and root formation and eruption of human deciduous teeth. *Am. J. Phys. Anthropol.* **123**, 172 (2004).
- 10 S. J. AlQahtani, *Atlas of human tooth development and eruption* (Queen Mary and Westfield College, www.atlas.dentistry.qmul.ac.uk, 2009).
- 11 D. H. Ubelaker, *Human Skeletal Remains: Excavation, Analysis, Interpretation*, 2nd ed. (Taraxacum, Washington, 1989).
- 12 P. W. Sciulli, Evolution of the dentition in prehistoric Ohio Valley Native Americans: II. Morphology of the deciduous dentition. *Am. J. Phys. Anthropol.* **106**, 189 (1998).
- 13 C. G. Turner, II, C.R. Nichol, G. R. Scott, In *Advances in Dental Anthropology*, M. S. Kelly, C. S. Larsen, Eds. (Wiley-Liss, New York, 1991), pp. 13-32.
- 14 J. D. Irish, Population continuity vs. discontinuity revisited: Dental affinities among late Paleolithic through Christian-era Nubians. *Am. J. Phys. Anthropol.* **128**, 520 (2005).
- 15 J. D. Irish, Who were the ancient Egyptians? Dental affinities among Neolithic through postdynastic peoples. *Am. J. Phys. Anthropol.* **129**, 529 (2006).
- 16 G. R. Scott, C. G. Turner II, *The anthropology of modern human teeth: Dental morphology and its variation in recent human populations*. (Cambridge University Press, Cambridge, 1997).
- 17 G. P. Rightmire, Dental variation and human history. *Rev. Archaeol.* **20**, 1 (1999).
- 18 M. Martinon-Torres, J. Bermudez de Castro, A. Gomez-Robles, et al., Dental evidence on the hominin dispersals during the Pleistocene. *Proc. Nat. Acad. Sci.* **104**, 13279 (2007).
- 19 C. S. Larsen, *Bioarchaeology* (Cambridge University Press, Cambridge 1997).
- 20 D. Weaver, Sex differences in the ilia of a known sex and age sample of fetal and infant skeletons. *Am. J. Phys. Anthropol.* **52**, 191 (1980).
- 21 H. Schutkowski, Sex determination of infant and juvenile skeletons: I. Morphognostic features. *Am. J. Phys. Anthropol.* **90**, 199 (1993).
- 22 S. Holcomb, L. Konigsberg, Statistical study of sexual dimorphism in the human fetal sciatic notch. *Am. J. Phys. Anthropol.* **97**, 113 (1995).
- 23 L. A. Wilson, N. MacLeod, L. T. Humphrey, Morphometric criteria for sexing juvenile human skeletons using the ilium. *J. Forensic Sci.* **53**, 269 (2008).

- 24 L. A. Wilson, H. F. Cardoso, L. T. Humphrey, On the reliability of a geometric morphometric approach to sex determination: A blind test of six criteria of the juvenile ilium. *J. Forensic Sci.* **206**, 35 (2011).

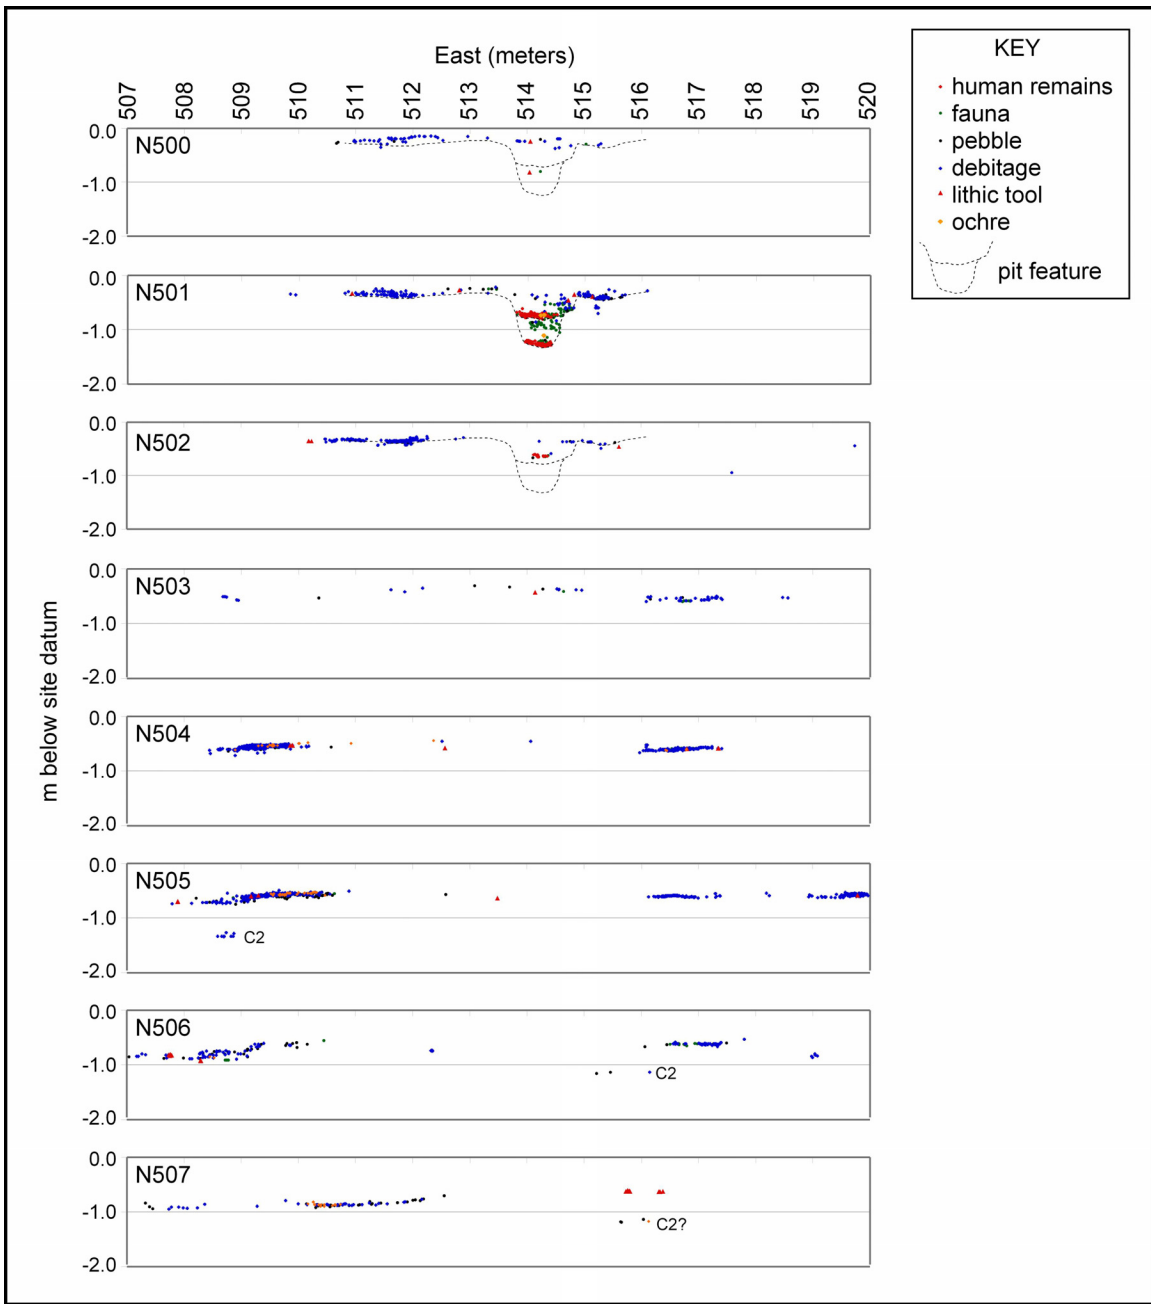

**Fig. S1.** Backscatter plot for East 507-520 by 1 m unit north.

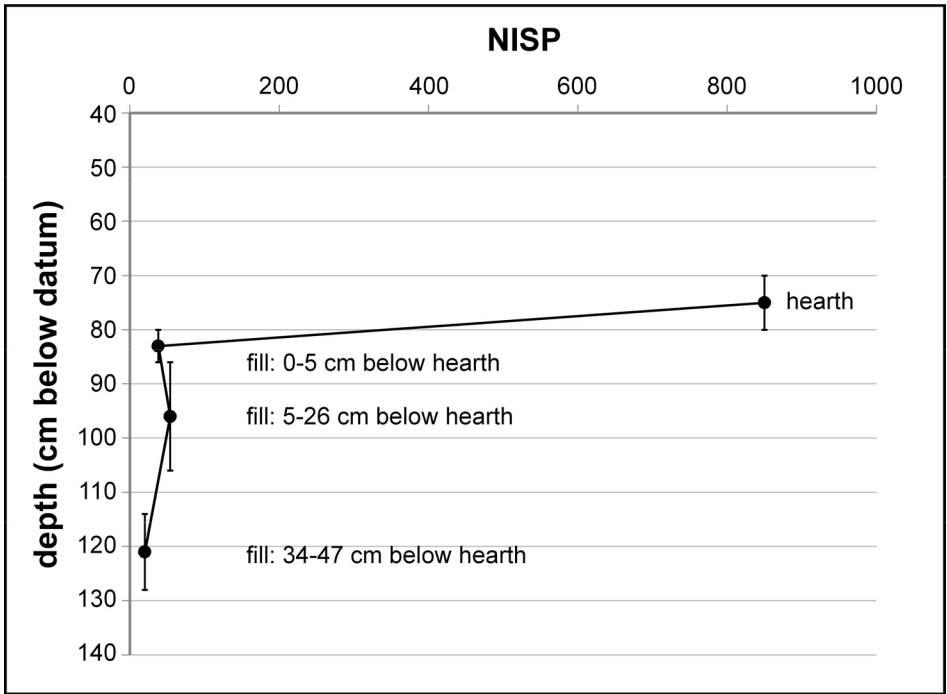

Fig. S2. Faunal NISP by depth.

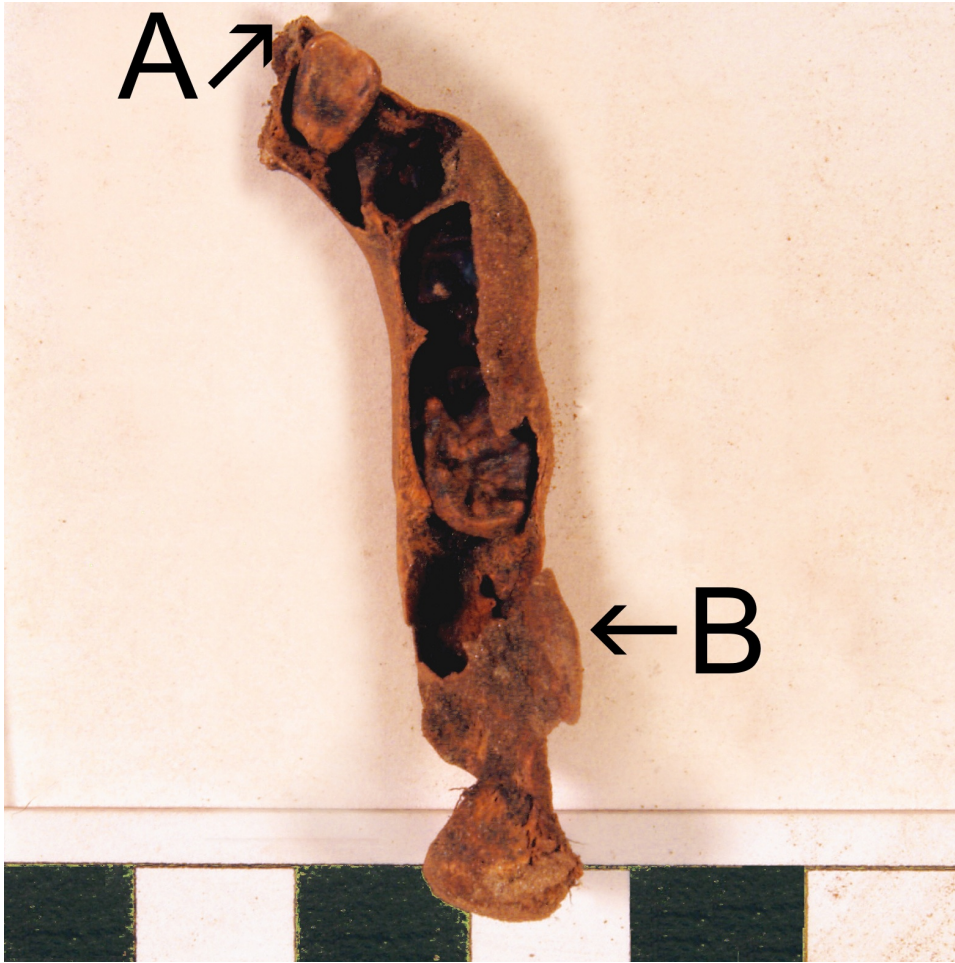

**Fig. S3.** Right mandible half of Individual 1, showing A) faint protrusion of a narrow mental eminence, and B) lack of gonial eversion, that is suggestive of female (21).

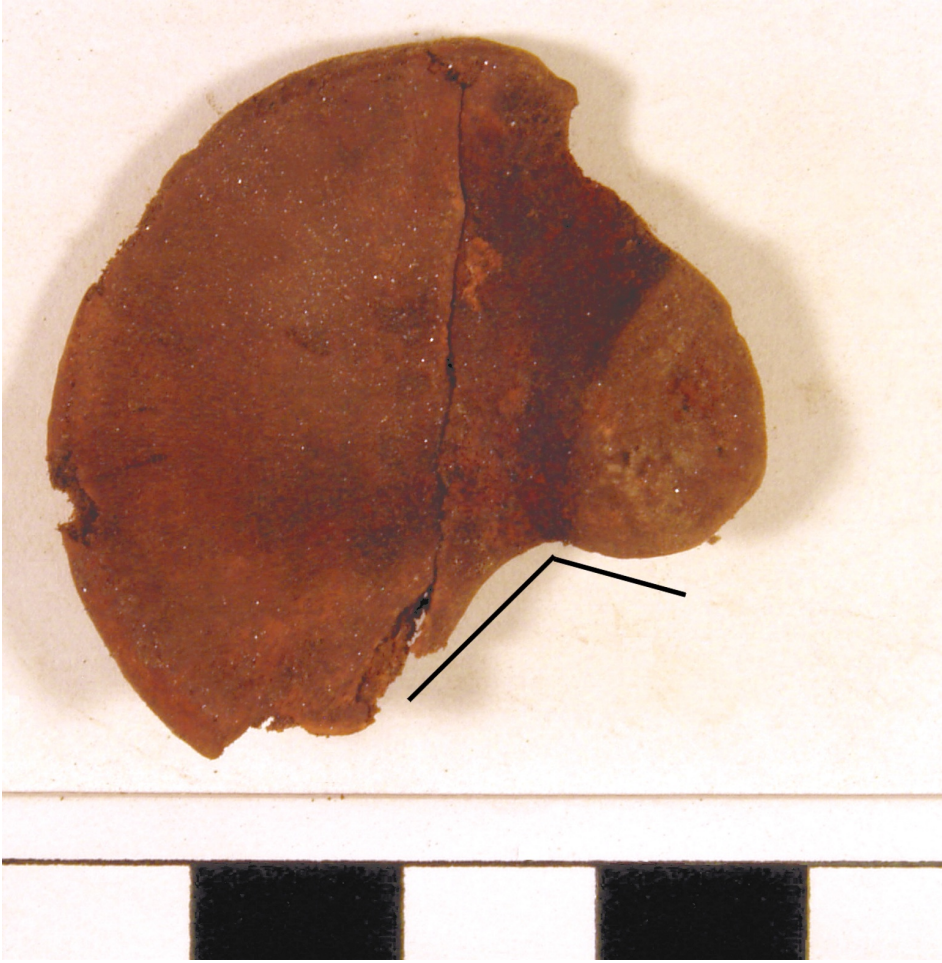

**Fig. S4.** Right ilium from Individual 1 exhibiting shallow oblique greater sciatic notch that is suggestive of female (21).



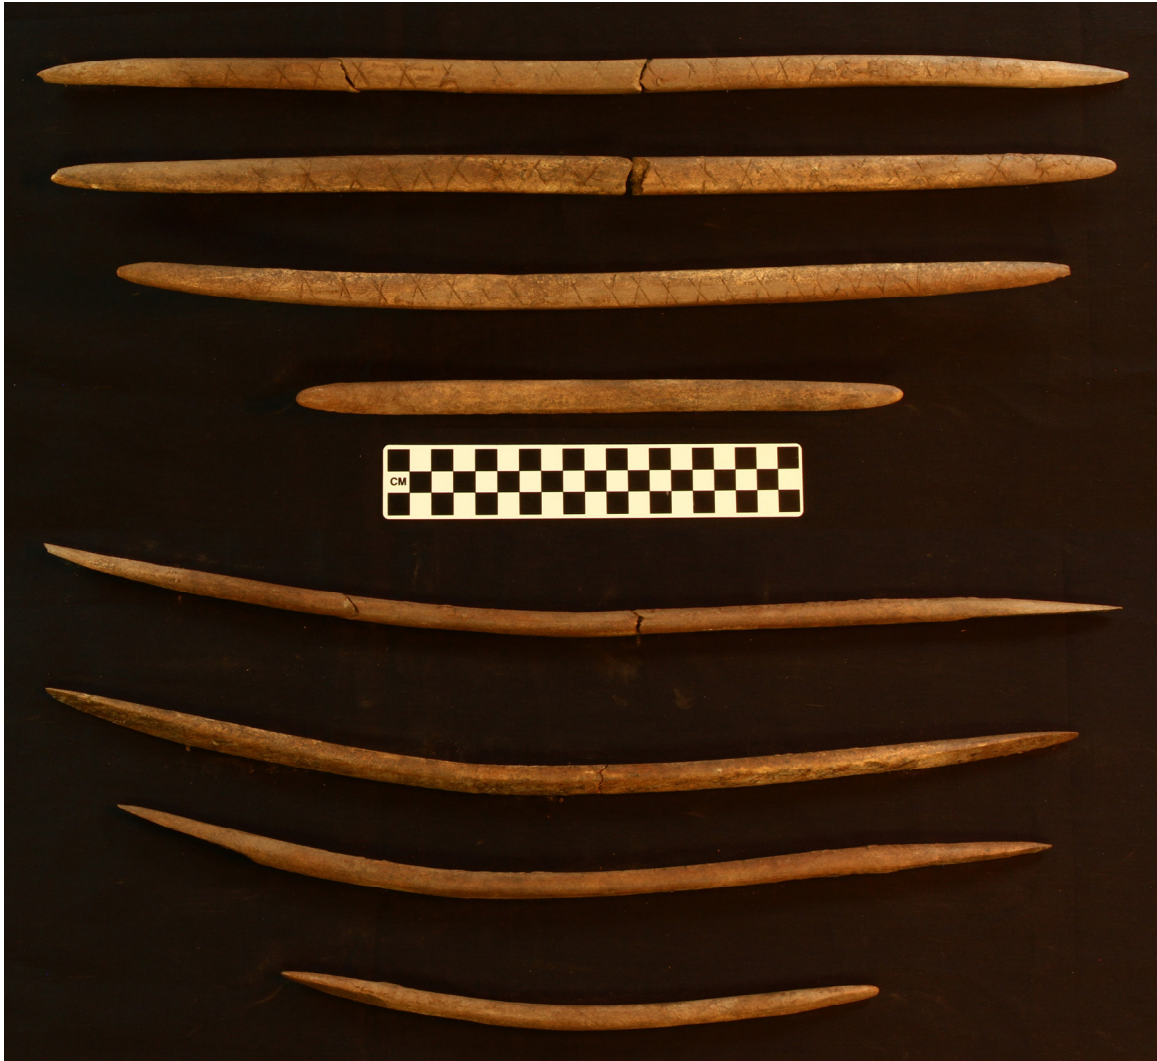

**Fig. S5.** Antler foreshafts, top views (on recovery, except for shortest foreshaft) and side views.

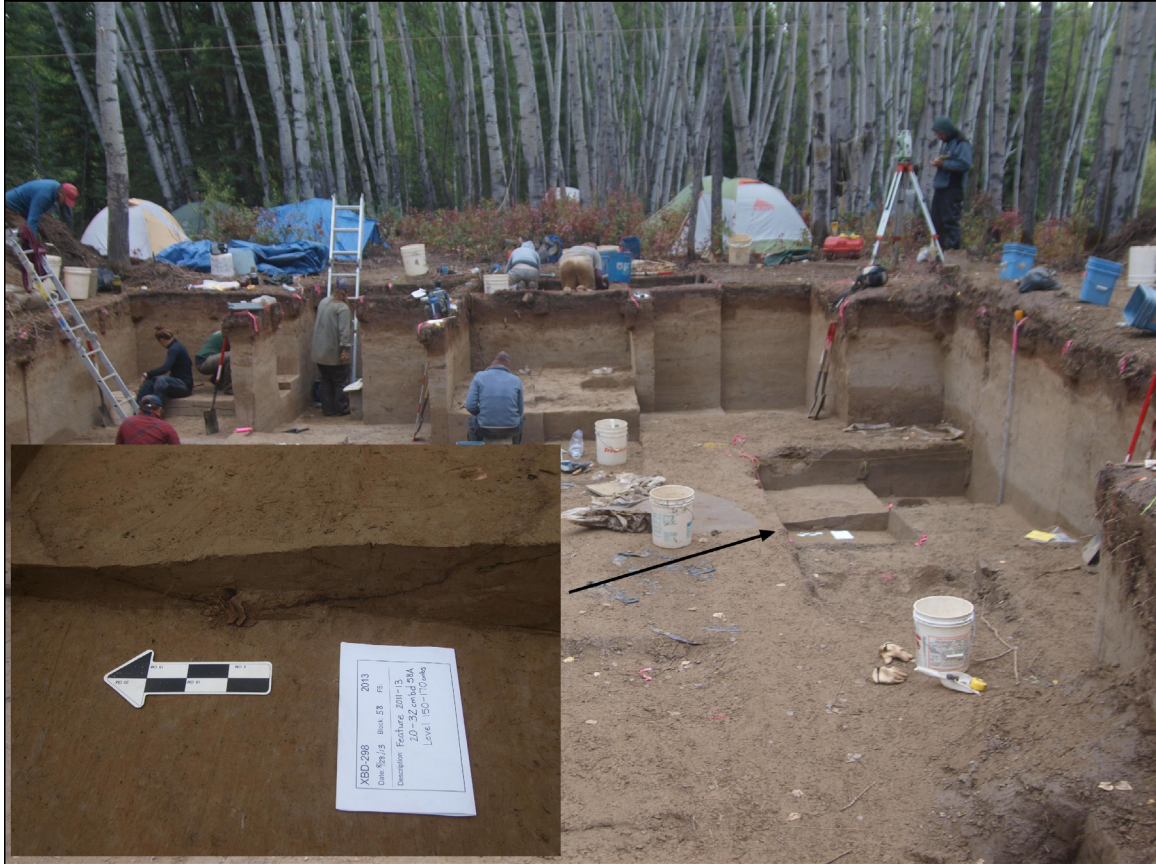

**Fig. S6.** Overview of USR site, view west. **(Inset)** burial pit on discovery of human remains.



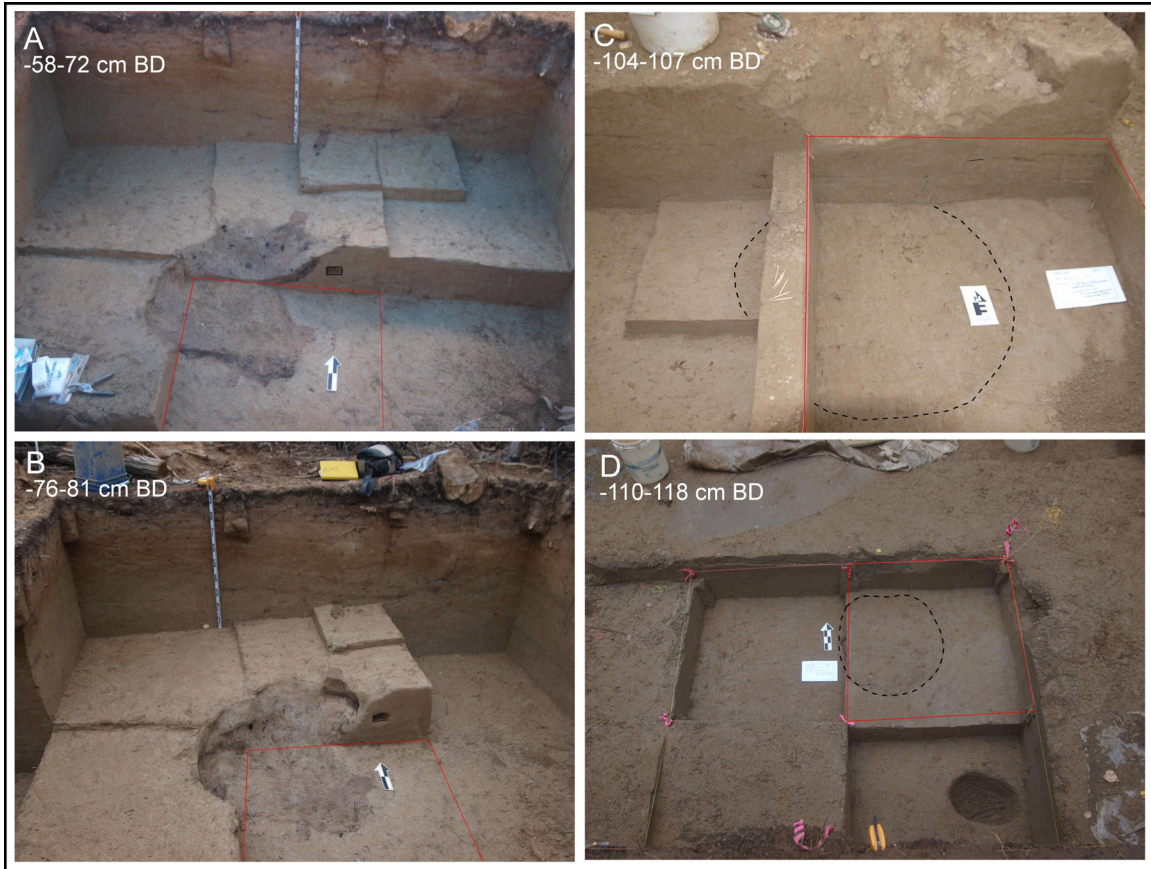

**Fig. S7.** Excavation of cremation hearth and burial pit. (A) surface of cremation hearth, (B) bottom of oxidized hearth, (C) pit feature outline, (D) pit feature on discovery of human remains. Red lines are excavation unit N501E514.

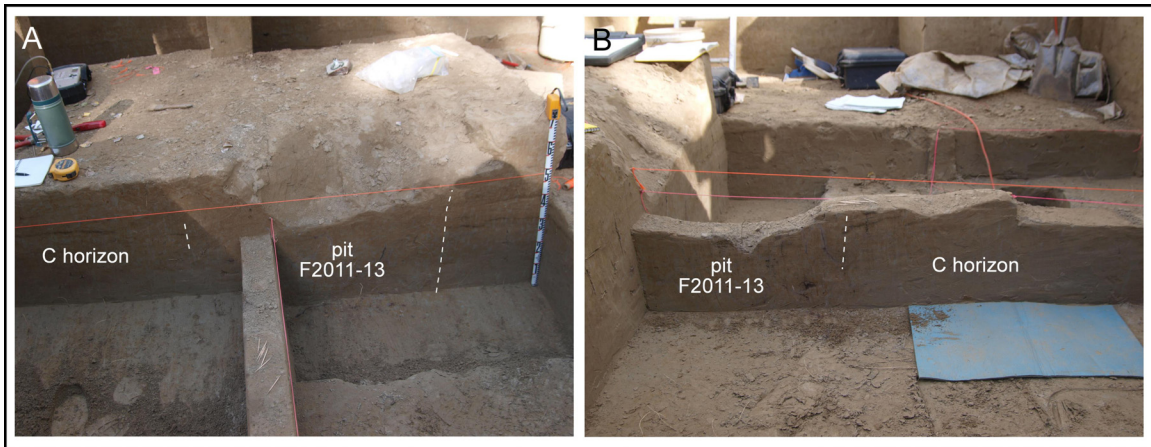

**Fig. S8.** Stratigraphy of burial pit, view north (A), and east (B).

Table S1. Radiocarbon results for cremation hearth and burial pit.

| <i>Lab No.</i> | <i>Material</i>                         | <i>14C yr BP</i> | $\delta^{13}C$ | <i>Cal BP (2 sd)</i> | <i>Cal BP (1 sd)</i> |
|----------------|-----------------------------------------|------------------|----------------|----------------------|----------------------|
| Beta-280584    | charcoal ( <i>Populus/Salix</i> sp.)    | 9920±80          | NA             | 11700-11200          | 11600-11230          |
| Beta-280585    | charcoal ( <i>Populus balsamifera</i> ) | 9990±50          | -24.0          | 11700-11260          | 11600-11320          |
| Beta-280586    | charcoal ( <i>Populus balsamifera</i> ) | 10020±50         | -23.4          | 11750-11290          | 11690-11360          |
| Beta-371567    | charcoal ( <i>Betula</i> sp.)           | 9930±50          | -23.9          | 11600-11230          | 11390-11250          |
| Average        |                                         | 9973±27          |                | 11600-11270          | 11590-11290          |

Table S2. Faunal remains from the cremation hearth and burial pit.

| <i>Taxon (common name)</i>                   | <i>Hearth</i> |              |               | <i>Burial Pit Fill</i> |              |               | <i>Total</i> |              |
|----------------------------------------------|---------------|--------------|---------------|------------------------|--------------|---------------|--------------|--------------|
|                                              | <i>NISP</i>   | <i>%NISP</i> | <i>%burn.</i> | <i>NISP</i>            | <i>%NISP</i> | <i>%burn.</i> | <i>NISP</i>  | <i>%NISP</i> |
| <b>Pisces</b>                                | <b>326</b>    | <b>39.4</b>  |               | <b>36</b>              | <b>35.0</b>  |               | <b>362</b>   | <b>38.9</b>  |
| <i>Oncorhynchus</i> sp. (salmon)             | 308           | 37.2         | 96.1          | 29                     | 28.2         | 27.6          | 337          | 36.2         |
| Salmonidae (small salmonid)                  | 18            | 2.2          | 100.0         | 7                      | 6.8          | 0.0           | 25           | 2.7          |
| <b>Mammalia</b>                              | <b>473</b>    | <b>57.2</b>  |               | <b>67</b>              | <b>65.1</b>  |               | <b>540</b>   | <b>58.1</b>  |
| <i>Urocitellus parryii</i> (ground squirrel) | 191           | 23.1         | 95.9          | 51                     | 49.5         | 14.6          | 242          | 26.1         |
| <i>Lepus americanus</i> (snowshoe hare)      | 46            | 5.6          | 100.0         | 2                      | 1.9          | 0.0           | 48           | 5.2          |
| <i>Marmota</i> sp. (marmot)                  | 4             | 0.5          | 100.0         | -                      | -            | -             | 4            | 0.4          |
| <i>Sorex</i> sp. (shrew)                     | 1             | 0.1          | 100.0         | -                      | -            | -             | 1            | 0.1          |
| Avicolinae (vole and microtine)              | 231           | 27.9         | 99.6          | 14                     | 13.6         | 28.6          | 245          | 26.3         |
| <b>Aves</b>                                  | <b>28</b>     | <b>3.4</b>   |               | <b>-</b>               | <b>-</b>     | <b>-</b>      | <b>28</b>    | <b>3.0</b>   |
| Tetraoninae (ptarmigan/grouse)               | 16            | 1.9          | 100.0         | -                      | -            | -             | 16           | 1.7          |
| Paridae (passerine)                          | 11            | 1.3          | 100.0         | -                      | -            | -             | 11           | 1.2          |
| Aves (possibly Picidae)                      | 1             | 0.1          | 100.0         | -                      | -            | -             | 1            | 0.1          |
| <b>Total NISP</b>                            | <b>827</b>    | <b>100.0</b> |               | <b>103</b>             | <b>100.0</b> |               | <b>930</b>   | <b>100.0</b> |

Table S3. Individual 2 skeletal part elevations, ordered by depth

| <i>Skeletal part</i>  | <i>average depth<br/>(cm below site<br/>datum)</i> | <i>Sd</i> | <i>n points</i> |
|-----------------------|----------------------------------------------------|-----------|-----------------|
| Pelvis / sacrum       | -128.3                                             | 0.006     | 8               |
| Lower limb            | -128.1                                             | 0.005     | 13              |
| Ribs                  | -128.0                                             | 0.004     | 28              |
| Vertebrae (lumbar)    | -128.0                                             | 0.003     | 5               |
| Vertebrae (cervical)  | -128.0                                             | 0.006     | 7               |
| Upper limb            | -127.9                                             | 0.005     | 21              |
| Tarsals and phalanges | -127.8                                             | 0.004     | 9               |
| Carpals and phalanges | -127.5                                             | 0.002     | 7               |
| Vertebrae (thoracic)  | -127.4                                             | 0.013     | 20              |
| Cranium (vault)       | -127.2                                             | 0.006     | 10              |
| Cranium (base)        | -127.2                                             | 0.005     | 13              |
| Mandible              | -127.2                                             | 0.003     | 4               |

Table S4. Measurements (mm) of cranial elements and long bones of Individual 1 with estimated post-natal ages in weeks from greatest dimensions.

|                        | <i>Left</i>       | <i>Mid</i> | <i>Right</i>      | <i>Age1</i> | <i>Age2</i> | <i>Age3</i> | <i>Age4</i> | <i>Age5</i> | <i>Age6</i> | <i>Age7</i> | <i>Min</i> | <i>Max</i> |
|------------------------|-------------------|------------|-------------------|-------------|-------------|-------------|-------------|-------------|-------------|-------------|------------|------------|
| <b>Zygomatic</b>       |                   |            |                   |             |             |             |             |             |             |             |            |            |
| Length                 | 23.1              |            | 22.2 <sup>1</sup> | >4          |             |             |             |             |             |             | >4         | >4         |
| Oblique height         | 20.2              |            | 21.0              | >0          |             |             |             |             |             |             | >0         | >0         |
| <b>Maxilla</b>         |                   |            |                   |             |             |             |             |             |             |             |            |            |
| Length                 | 32.2              |            |                   | >0          |             |             |             |             |             | 0-12        | >0         | 0-12       |
| Oblique length         | 34.3              |            |                   | >0          |             |             |             |             |             | 0-12        | >0         | 0-12       |
| <b>Mandible</b>        |                   |            |                   |             |             |             |             |             |             |             |            |            |
| Oblique length         |                   |            | 54.1              | >0          |             |             |             |             |             | >16         | >0         | >16        |
| Width                  |                   |            | 19.8              | >0          |             |             |             |             |             | 0-12        | >0         | 0-12       |
| Body length            |                   |            | 40.7              | >0          |             |             |             |             |             |             | >0         | >0         |
| <b>Pars petrosa</b>    |                   |            |                   |             |             |             |             |             |             |             |            |            |
| Length                 | 43.9              |            | 43.7              | >0          |             |             |             |             |             |             | >0         | >0         |
| Width                  | 21.2 <sup>1</sup> |            | 23.8              | >-10        |             |             |             |             |             |             | >-10       | >-10       |
| <b>Pars lateralis</b>  |                   |            |                   |             |             |             |             |             |             |             |            |            |
| Length                 | 28.0              |            |                   | >0          |             |             |             |             |             |             | >0         | >0         |
| Width                  | 20.8              |            |                   | >0          |             |             |             |             |             |             | >0         | >0         |
| <b>Pars basilaris</b>  |                   |            |                   |             |             |             |             |             |             |             |            |            |
| Sagittal length        |                   | 12.8       |                   | <0          |             |             |             |             | >12         |             | <0         | >12        |
| Width                  |                   | 17.7       |                   | >0          |             |             |             |             |             |             | >0         | >0         |
| Maximum length         |                   | 18.2       |                   | >0          |             |             |             |             |             |             | >0         | >0         |
| <b>Clavicle</b>        |                   |            |                   |             |             |             |             |             |             |             |            |            |
| Length                 | 43.7              |            |                   | <0          |             |             |             |             |             |             | <0         | <0         |
| <b>Humerus</b>         |                   |            |                   |             |             |             |             |             |             |             |            |            |
| Length                 | 69.1              |            | 69.2              | >0          | >0          | 0.38±       | <6          | <4          |             |             | >0         | <6         |
| Midshaft diameter      | 6.2               |            | 6.0               |             |             | 2.33        |             |             |             |             |            |            |
| Distal extremity width | 18.3              |            |                   | >0          |             |             |             |             |             |             | >0         | >0         |
| <b>Radius</b>          |                   |            |                   |             |             |             |             |             |             |             |            |            |
| Length                 | 59.6              |            | 59.0              | >0          | >0          | 2.23±       | 6           | 4           |             |             | >0         | 6          |
| Midshaft diameter      | 4.3               |            | 4.7               |             |             | 2.29        |             |             |             |             |            |            |



Table S4, continued.

|                        | <i>Left</i>       | <i>Right</i> | <i>Age1</i> | <i>Age2</i> | <i>Age3</i>    | <i>Age4</i> | <i>Age5</i> | <i>Age6</i> | <i>Age7</i> | <i>Min</i> | <i>Max</i> |
|------------------------|-------------------|--------------|-------------|-------------|----------------|-------------|-------------|-------------|-------------|------------|------------|
| <b>Ulna</b>            |                   |              |             |             |                |             |             |             |             |            |            |
| Length                 | 67.0 <sup>1</sup> | 65.6         | >0          | >0          | 1.8 ±<br>2.20  | 6           | 4           |             |             | >0         | 6          |
| Midshaft diameter      | 4.4               | 3.9          |             |             |                |             |             |             |             |            |            |
| <b>Ilium</b>           |                   |              |             |             |                |             |             |             |             |            |            |
| Length                 | 36.4              | 37.3         | >0          |             |                |             |             |             |             | >0         | >0         |
| Width                  | 31.5              | 33.2         | >0          |             |                |             |             |             |             | >0         | >0         |
| <b>Pubis</b>           |                   |              |             |             |                |             |             |             |             |            |            |
| Length                 | 16.7              | 16.2         | >0          |             |                |             |             |             |             | >0         | >0         |
| <b>Ischium</b>         |                   |              |             |             |                |             |             |             |             |            |            |
| Length                 |                   | 20.8         |             |             |                |             |             |             |             |            |            |
| Width                  | 12.8 <sup>1</sup> | 11.8         | >0          | >0          |                |             |             |             |             | >0         | >0         |
| <b>Femur</b>           |                   |              |             |             |                |             |             |             |             |            |            |
| Length                 | 83.8              | 83.6         | >0          | >0          | 1.24 ±<br>2.08 | <6          | <4          |             |             | >0         | <6         |
| Midshaft diameter      | 7.3               | 7.1          |             |             |                |             |             |             |             |            |            |
| Distal extremity width | 23.3              |              |             |             |                |             |             |             |             |            |            |
| <b>Tibia</b>           |                   |              |             |             |                |             |             |             |             |            |            |
| Length                 | 73.0              | 72.9         | >0          | >0          | 2.18 ±<br>2.12 | >6          | >4          |             |             | >0         | >6         |
| Midshaft diameter      | 6.4               | 6.1          |             |             |                |             |             |             |             |            |            |
| <b>Fibula</b>          |                   |              |             |             |                |             |             |             |             |            |            |
| Length                 |                   | 68.2         | >0          | >0          |                |             |             |             |             | >0         | >0         |
| Midshaft diameter      |                   | 3.9          |             |             |                |             |             |             |             |            |            |

<sup>1</sup>Estimated measurement from damaged element.

Age1 = Mean values from tables in (3) based on measurements closest to actual dimensions.

Age2 = Values from (4) in (8).

Age3 = Values from (4) in (8).

Age4 = Values from (2) in (8).

Age5 = Values from (1) in (8).

Age6 = Values from (7) in (8).

Age7 = Values from (6) in (8).

Table S5. Measurements (mm) of cranial elements and long bones of Individual 2 with estimated gestational ages in weeks from greatest dimensions.

|                        | <i>Left</i> | <i>Mid</i> | <i>Right</i> | <i>Age1</i> | <i>Age2</i> | <i>Age3</i> | <i>Age6</i> | <i>Age7</i> | <i>Min</i> | <i>Max</i> |
|------------------------|-------------|------------|--------------|-------------|-------------|-------------|-------------|-------------|------------|------------|
| <b>Zygomatic</b>       |             |            |              |             |             |             |             |             |            |            |
| Length                 |             |            | 18.4         | 32          |             |             |             |             | 32         | 32         |
| Oblique height         | 16.2        |            | 15.4         | 32          |             |             |             |             | 32         | 32         |
| <b>Pars petrosa</b>    |             |            |              |             |             |             |             |             |            |            |
| Length                 | 27.7        |            | 27.6         | 32          |             |             |             |             | 32         | 32         |
| Width                  | 14.3        |            | 14.3         | >32         |             |             |             |             | >32        | >32        |
| <b>Pars lateralis</b>  |             |            |              |             |             |             |             |             |            |            |
| Length                 | 19.4        |            | 20.2         | >34         |             |             |             |             | >34        | >34        |
| Width                  | 11.5        |            | 11.0         | 36          |             |             |             |             |            |            |
| <b>Pars basilaris</b>  |             |            |              |             |             |             |             |             |            |            |
| Sagittal length        |             | 11.8       |              | 36          |             |             | <38         |             | 36         | <38        |
| Width                  |             | 12.5       |              | 36          |             |             | 38          |             | 36         | 38         |
| <b>Humerus</b>         |             |            |              |             |             |             |             |             |            |            |
| Length                 | 50.0        |            | 49.8         | <32         | <30         | 31.58±2.33  |             |             | <30        | <32        |
| Midshaft diameter      | 3.5         |            | 4.3          |             |             |             |             |             |            |            |
| Distal extremity width | 11.1        |            | 11.2         | >28         |             |             |             |             | >28        | >28        |
| <b>Ulna</b>            |             |            |              |             |             |             |             |             |            |            |
| Length                 | 48.6        |            |              | <34         | >30         | 32.47±2.20  |             |             | >30        | <34        |
| Midshaft diameter      | 2.3         |            |              |             |             |             |             |             |            |            |
| <b>Ilium</b>           |             |            |              |             |             |             |             |             |            |            |
| Length                 | 25.3        |            | 25.8         | >32         |             |             |             | <40         | >32        | <40        |
| Width                  | 22.0        |            | 21.8         | 32          |             |             |             | <40         | 32         | <40        |
| <b>Pubis</b>           |             |            |              |             |             |             |             |             |            |            |
| Length                 | 9.4         |            | 9.8          | 32          |             |             |             |             | 32         | 32         |
| <b>Ischium</b>         |             |            |              |             |             |             |             |             |            |            |
| Length                 | 13.5        | 13.4       |              | 34          |             |             |             |             | 34         | 34         |
| Width                  | 8.6         | 8.7        |              | <34         |             |             |             |             | <34        | <34        |
| <b>Femur</b>           |             |            |              |             |             |             |             |             |            |            |
| Length                 | 56.5        | 56.6       |              | >32         | <30         | 32.25±2.08  |             |             | <30        | >32        |
| Midshaft diameter      | 4.8         | 4.8        |              | 32          |             |             |             |             | 32         | 32         |
| Distal extremity width | 13.9        | 14.5       |              |             |             |             |             |             |            |            |

Table S5, continued.

|                   | <i>Left</i> | <i>Mid</i> | <i>Right</i> | <i>Age1</i> | <i>Age2</i> | <i>Age3</i> | <i>Age6</i> | <i>Age7</i> | <i>Min</i> | <i>Max</i> |
|-------------------|-------------|------------|--------------|-------------|-------------|-------------|-------------|-------------|------------|------------|
| <b>Tibia</b>      |             |            |              |             |             |             |             |             |            |            |
| Length            | 49.0        | 49.5       |              | >32         | <30         | 32.30±2.12  |             |             | <30        | >32        |
| Midshaft diameter | 4.2         | 4.4        |              |             |             |             |             |             |            |            |
| <b>Fibula</b>     |             |            |              |             |             |             |             |             |            |            |
| Length            | 45.9        | 47.2       |              | >32         | 30          |             |             |             | 30         | >32        |
| Midshaft diameter | 1.8         | 2.1        |              |             |             |             |             |             |            |            |

Age1 = Mean values from tables in (3) based on measurements closest to actual dimensions.  
 Age2 = Values from (4) in (8).  
 Age3 = Values from (4) in (8).  
 Age6 = Values from (7) in (8).  
 Age7 = Values from (6) in (8).

Table S6. Estimated post-natal ages in weeks for Individual 1 based on crown development.

|                             | <i>Stage</i> | <i>AgeA</i> | <i>Stage</i> | <i>AgeB</i>    |
|-----------------------------|--------------|-------------|--------------|----------------|
| <b>Maxillary</b>            |              |             |              |                |
| dm2                         | Coc          | >6 -- <18   | B            | <15.1 +/- 7.3  |
| dm1                         | Cr1/2        | >6 -- <18   | C            | 9.4 +/- 13.5   |
| dc                          | Coc-Cr1/2    | 18          | B-C          | <17.7 +/- 10.0 |
| di1                         | Cr3/4-Crc    | >6 -- <18   | C-D          | <6.2 +/- 12.5  |
| di2                         | Cr3/4        | 6           | C-D          | <14.6 +/- 12.5 |
| <b>Mandibular</b>           |              |             |              |                |
| dm2                         | Coc-Cr1/2    | >6 -- <18   | B-C          | <20.3 +/- 10.9 |
| dm1                         | Cr3/4        | 18          | C            | 6.8 +/- 13.0   |
| dc                          | Cr1/2        | 18          | C            | 19.8 +/- 9.4   |
| di1                         | Crc+         | 6           | D-E          | <16.6 +/- 6.8  |
| di2                         | Crc          | 6           | D            | 16.6 +/- 3.6   |
| <b>Interpolated Average</b> |              | 12 weeks    |              | <14 weeks      |

AgeA = from (10), with ages in months converted to weeks

AgeB = from (9), with ages in years converted to weeks

Table S7. Nonmetric crown traits in comparative Native American sample and Individual 1

| <i>Tooth</i> | <i>Trait</i>        | <i>Comparative Sample*</i> |                     |          | <i>Individual 1</i> |              |
|--------------|---------------------|----------------------------|---------------------|----------|---------------------|--------------|
|              |                     | <i>n</i>                   | <i>Break-points</i> | <i>%</i> | <i>Status</i>       | <i>Grade</i> |
| dui1         | Shovel              | 163                        | 2-3                 | 77.3     | Absent*             | 1            |
|              | Double shovel       | 157                        | 1-3                 | 20.4     | Absent              | 0            |
|              | Interruption groove | 161                        | 1-4                 | 0.0      | Absent              | 0            |
|              | Tuberculum dentale  | 155                        | 1-4                 | 11.6     | Present?            | 1?           |
| dui2         | Shovel              | 147                        | 2-3                 | 92.5     | Present             | 2            |
|              | Double shovel       | 143                        | 1-3                 | 10.5     | Absent              | 0            |
|              | Interruption groove | 149                        | 1-4                 | 0.0      | Absent              | 0            |
|              | Tuberculum dentale  | 139                        | 1-4                 | 15.1     | Present*            | 1            |
| duc          | Shovel              | 162                        | 2-3                 | 87.7     | Present?            | 2?           |
|              | Double shovel       | 158                        | 1-3                 | 9.5      | Present?            | 2?           |
|              | Distal acc ridge    | 150                        | 1-4                 | 30.0     | Present             | 1            |
| dum1         | Cusp number         | 188                        | 4                   | 49.5     | Present             | 4            |
| dum2         | Cusp 5              | 206                        | P                   | 26.7     | Absent              | A            |
| dli1         | Shovel              | 118                        | 2-3                 | 38.9     | Absent              | 1            |
| dli2         | Shovel              | 147                        | 2-3                 | 65.3     | Present             | 2            |
| dlc          | Shovel              | 150                        | 2-3                 | 90.7     | Present             | 2            |
|              | Tuberculum dentale  | 144                        | 1-4                 | 5.6      | Absent?             | 0?           |
|              | Distal acc ridge    | 144                        | 1-4                 | 11.1     | Absent              | 0            |
| d1m1         | Delta form          | 219                        | Triangle            | 21.9     | Absent              | 0            |
| d1m2         | Cusp 6              | 230                        | 1-5                 | 43.9     | Present             | 2            |
|              | Cusp 7              | 230                        | 1-5                 | 47.4     | Absent              | 0            |
|              | Groove pattern      | 203                        | Y                   | 93.1     | Present             | Y            |

\* Comparative sample of prehistoric Ohio Native Americans, traits, and presence/absence breakpoints from Sciulli (12).

Table S8. USR burial pit biface measurements.

| <i>Specimen</i> | <i>Length</i> | <i>Width</i> | <i>Thickness</i> | <i>Width/thickness</i> | <i>Wt. (g)</i> | <i>Lithology (color)</i> |
|-----------------|---------------|--------------|------------------|------------------------|----------------|--------------------------|
| 58-87           | 92.4          | 27.4         | 9.2              | 3.0                    | 23.63          | Basalt (N 3/1)           |
| 58-88           | 83.2          | 21.8         | 8.8              | 2.5                    | 16.63          | Basalt (N 3/1)           |
| 58-86           | 86.1          | 37.2         | 11.0             | 3.4                    | 32.69          | Rhyolite (7.5 YR 6/2)    |

Note: All linear measurements in mm. Width and thickness are maximum values.

Table S9. Antler foreshaft metric data.

| <i>Specimen</i> | <i>Wt (g)</i> | <i>Length</i> | <i>Width<br/>(midpoint)</i> | <i>Thickness<br/>(midpoint)</i> |
|-----------------|---------------|---------------|-----------------------------|---------------------------------|
| 58-82           | 54.48         | 279           | 15.2                        | 11.3                            |
| 58-85           | 103.56        | 525           | 16.4                        | 11.4                            |
| 58-83           | 112.01        | 492           | 18.4                        | 12.0                            |
| 58-84           | 107.27        | 446           | 17.0                        | 11.5                            |

Note: All linear measurements in mm.

Table S10. Depth sequence for cremation hearth and burial pit (cm below site datum).

| <i>Description<br/>(depth order)</i> | <i>Avg. Depth</i> | <i>Depth ranges</i> | <i>N points</i> |
|--------------------------------------|-------------------|---------------------|-----------------|
| Occupation surface (charcoal)        | -37 ± 7           | -18-45              | 133             |
| Hearth top rim perimeter (lithics)   | -35 ± 6           | -23-43              | 42              |
| Hearth: cremated human remains       | -73 ± 3           | -65-81              | 163             |
| Hearth: fauna                        | -69 ± 15          | -67-82              | 33              |
| Hearth: bottom                       | -73 ± 7           | -51-80              | 78              |
| Fauna in fill                        | -92 ± 3           | -84-106             | 39              |
|                                      | -123 ± 3          | -114-127            | 14              |
| Individual 1                         | -123 ± 1          | -121-129            | 192             |
| Individual 2                         | -128 ± 1          | -122-129            | 151             |
| Bottom of pit (F2011-13)             | -123 ± 4          | -111-129            | 54              |
